# Supplementary material for: A trial to determine whether septic shock-reversal is quicker in pediatric patients randomized to an early goal-directed fluid-sparing strategy versus usual care (SQUEEZE): study protocol for a pilot randomized controlled trial
Source: PubMed Central journal article supplement (PMC5120449; doi:10.1186/s13063-016-1689-2), 2016-11-22
Supplement: 13063_2016_1689_MOESM5_ESM.pdf [file 13063_2016_1689_MOESM5_ESM.pdf]

**Additional File 5.** ACCM Goal Directed Targets from the Surviving Sepsis Guidelines (3, 4)

Initial Goals (Often, but not exclusively in the Emergency Department setting)

Initial therapies should be directed toward restoring:

- Normal Mental Status
- Threshold Heart Rates
- Peripheral perfusion (capillary refill < 3 seconds)
- Palpable distal pulses
- Normal blood pressure for age.

| Age Range      | Threshold Heart Rates | *Threshold Perfusion Pressure MAP-CVP (mm Hg) |
|----------------|-----------------------|-----------------------------------------------|
| Term Newborn   | 120-180               | 55                                            |
| Up to 1 year   | 120-180               | 60                                            |
| Up to 2 years  | 120-180               | 65                                            |
| Up to 7 years  | 100-140               | 65                                            |
| Up to 15 years | 90-140                | 65                                            |

\*Perfusion Pressure = Mean Arterial Pressure (MAP) – Central Venous Pressure (CVP)

*\*From a practical perspective, perfusion pressure data is frequently not available for children during the initial phase of septic shock resuscitation due to lack of presence of an arterial line and/or central venous catheter. Thus, initial goals of resuscitation may be limited to the other parameters outlined until invasive monitoring is available.*

Subsequent Goals (Intensive Care Unit) Phase

Shock should be further evaluated and resuscitation treatment guided by hemodynamic variables:

- Monitor CVP in PICU (ensure adequate preload)
- Maintain Adequate Perfusion Pressure: Normal MAP-CVP
- Maintain Oxygen Delivery: Mixed Venous Oxygen Saturation [SCVO<sub>2</sub>] > 70%
- Maintain Oxygen Carrying Capacity: Hemoglobin Concentration > 10 g/dL
