# Supplementary material for: A trial to determine whether septic shock-reversal is quicker in pediatric patients randomized to an early goal-directed fluid-sparing strategy versus usual care (SQUEEZE): study protocol for a pilot randomized controlled trial
Source: Springer Nature journal article supplement (doi:10.1186/s13063-016-1689-2), 2016-11-22
Supplement: MOESM3 [file 11100458]

**Additional File 3.** Schedule of enrolment, interventions, and assessments

|                                                               | Enrolment | STUDY PERIOD |                 |    |    |    |    |      |    | Close-out |
|---------------------------------------------------------------|-----------|--------------|-----------------|----|----|----|----|------|----|-----------|
|                                                               |           | Allo-cation  | Post Allocation |    |    |    |    |      |    |           |
| Timepoint                                                     | -t1       | 0            | t1              | t2 | t3 | t4 | t5 | t... | tx |           |
| <b>Enrolment:</b>                                             |           |              |                 |    |    |    |    |      |    |           |
| Eligibility Screen                                            | X         |              |                 |    |    |    |    |      |    |           |
| Informed Consent                                              |           |              |                 |    |    |    |    |      |    |           |
| Allocation                                                    |           | X            |                 |    |    |    |    |      |    |           |
| <b>Interventions:</b>                                         |           |              |                 |    |    |    |    |      |    |           |
| Usual Care                                                    |           |              |                 |    |    |    |    |      |    |           |
| Fluid Sparing                                                 |           |              |                 |    |    |    |    |      |    |           |
| <b>Assessments:</b>                                           |           |              |                 |    |    |    |    |      |    |           |
| Baseline variables                                            | X         | X            |                 |    |    |    |    |      |    |           |
| Initiation of study procedures                                |           |              | X               |    |    |    |    |      |    |           |
| Process Feasibility Outcomes                                  |           |              |                 |    |    |    |    |      |    |           |
| Resource Feasibility Outcomes                                 |           |              |                 |    |    |    |    |      |    |           |
| Feasibility of Study Management Outcomes                      |           |              |                 |    |    |    |    |      |    |           |
| Shock Reversal Outcome Data                                   |           |              |                 |    |    |    |    |      |    |           |
| Hemodynamic Outcome Data                                      |           |              |                 |    |    |    |    |      |    |           |
| USCOM Hemodynamic Data                                        |           |              |                 | X  | X  | X  | X  | X    | X  |           |
| *Fluid administration, losses, and fluid balance outcome data |           |              |                 |    |    |    |    |      |    |           |
| Vasoactive medication outcome data                            |           |              |                 |    |    |    |    |      |    |           |
| Adverse Events Related to Fluid Overload                      |           |              |                 |    | X  |    | X  | X    | X  | X         |

|                                                  |        |  |  |  |        |  |   |   |   |   |
|--------------------------------------------------|--------|--|--|--|--------|--|---|---|---|---|
| Adverse Events Related to Vasoactive Medications |        |  |  |  | X      |  | X | X | X | X |
| *Positive cultures Antimicrobials                |        |  |  |  | X      |  | X | X | X | X |
| Laboratory Results                               |        |  |  |  | X      |  | X | X | X | X |
| Clinical Course and Procedures Data              |        |  |  |  |        |  |   |   | X | X |
| Available Plasma sent for cfDNA determination    | ●————● |  |  |  | ●————● |  |   |   |   |   |

-t1: Enrolment

0: Time zero (Allocation)

t1: 1 hr post allocation

t2: 12 hrs post allocation

t3: 24 hrs post allocation

t4: 36 hrs post allocation

t5: 48 hrs post allocation

t... schedule repeats according to t2-t:5 until shock reversal is achieved.

Tx: 24 hrs post determination participant has achieved shock reversal

\* Data gathered will include data from the 24 hours immediately prior to enrolment, if available.
